# Supplementary material for: Using Robots at Home to Support Patients With Chronic Obstructive Pulmonary Disease: Pilot Randomized Controlled Trial
Source: PubMed Central journal article supplement (PMC5829456; doi:10.2196/jmir.8640), 2018-02-13
Supplement: jmir_v20i2e45_app1.pdf [file jmir_v20i2e45_app1.pdf]

|                                                                                  |                                                                 |                       |                     |                           | <u>Patients</u>      | <u>4 months</u>             | <u>Annualized</u>        |
|----------------------------------------------------------------------------------|-----------------------------------------------------------------|-----------------------|---------------------|---------------------------|----------------------|-----------------------------|--------------------------|
| <b>Benefit:</b>                                                                  |                                                                 |                       |                     |                           |                      |                             |                          |
|                                                                                  | Mean difference in total hospital costs per patient             |                       | NZ\$1579            |                           | 30                   | <u>NZ\$47,370</u>           | <u>NZ\$142,110</u>       |
| <b>Costs Ongoing:</b>                                                            |                                                                 |                       |                     |                           |                      |                             |                          |
|                                                                                  | Phone communication plans NZ\$46 per patient for 4 months       |                       | NZ\$184             |                           | 30                   | NZ\$5520                    | NZ\$16,560               |
|                                                                                  | Wi-Fi plans per robot NZ\$16 per month per patient for 4 months |                       | NZ\$64              |                           | 30                   | NZ\$1920                    | NZ\$5760                 |
|                                                                                  | Physiotherapist time 238 hours *NZ\$40 per hour                 |                       | NZ\$40              |                           | 238                  | <u>NZ\$9520</u>             | <u>NZ\$28,560</u>        |
|                                                                                  | Total                                                           |                       |                     |                           |                      | <u>NZ\$16,960</u>           | <u>NZ\$50,880</u>        |
| <b>Net benefit per annum</b>                                                     |                                                                 |                       |                     |                           |                      | <u>NZ\$30,410</u>           | <u><b>NZ\$91,230</b></u> |
| Present Value of annual benefits in real terms @ 3% real required rate of return |                                                                 |                       |                     |                           |                      |                             | <u>NZ\$417,807</u>       |
| <b><u>Investment Cost</u></b>                                                    |                                                                 |                       |                     |                           |                      |                             |                          |
|                                                                                  | Robot purchase                                                  |                       | NZ\$90,000          |                           |                      |                             |                          |
|                                                                                  | Dongles                                                         |                       | NZ\$2970            |                           |                      |                             |                          |
|                                                                                  | Phones                                                          |                       | NZ\$27,000          |                           |                      |                             |                          |
|                                                                                  | Initial training                                                |                       | <u>NZ\$240</u>      |                           |                      |                             | <u>NZ\$120,210</u>       |
| <b>Net present value</b>                                                         |                                                                 |                       |                     |                           |                      | <u><b>NZ\$297,597</b></u>   |                          |
| <b>Return on Investment:</b>                                                     |                                                                 |                       |                     |                           |                      |                             |                          |
| Annual benefit                                                                   |                                                                 |                       |                     |                           |                      |                             | NZ\$91,230               |
|                                                                                  |                                                                 |                       |                     | <b><u>Write-off</u></b>   | <b><u>Annual</u></b> |                             |                          |
| Annual Expenses:                                                                 |                                                                 | <b><u>Number:</u></b> | <b><u>Cost:</u></b> | <b><u>Total Cost:</u></b> | <b><u>Years:</u></b> | <b><u>Depreciation:</u></b> |                          |
| Depreciation:                                                                    | Robots                                                          | 30                    | NZ\$3000            | NZ\$90,000                | 5                    | NZ\$18,000                  |                          |
|                                                                                  | Dongles                                                         | 30                    | NZ\$99              | NZ\$2970                  | 5                    | NZ\$594                     |                          |
|                                                                                  | Phones                                                          | 30                    | NZ\$900             | NZ\$27,000                | 5                    | NZ\$5400                    |                          |
|                                                                                  | Training                                                        |                       |                     |                           |                      |                             |                          |
| Amortization:                                                                    | Hours                                                           | 6                     | NZ\$40              | NZ\$240                   | 5                    | NZ\$48                      |                          |
|                                                                                  |                                                                 |                       |                     |                           |                      |                             | <u>NZ\$24,042</u>        |
| Annual Profit                                                                    |                                                                 |                       |                     |                           |                      |                             | <u><b>NZ\$67,188</b></u> |
| Average Investment Cost over 5 years                                             |                                                                 |                       |                     |                           |                      |                             | <u><b>NZ\$60,105</b></u> |
| <b>Return on Investment</b>                                                      |                                                                 |                       |                     |                           |                      |                             | <b>112%</b>              |
